# Supplementary material for: What treatments work for anxiety in children with chronic fatigue syndrome/myalgic encephalomyelitis (CFS/ME)? Systematic review
Source: PubMed Central journal article supplement — BMJ Open. 2017 Sep 5;7(9):e015481. doi: 10.1136/bmjopen-2016-015481 (PMC5588976; doi:10.1136/bmjopen-2016-015481), 2017-09-05
Supplement: bmjopen-2016-015481supp001.pdf [file bmjopen-2016-015481supp001.pdf]

## Supplementary Information

### Search Terms used in OVID and Cochrane Library

| <b>Paediatric</b>                                                                                                                                                                                                                                                                                                                                                                                                                                                                                            | <b>CFS/ME</b>                                                                                                                                   |
|--------------------------------------------------------------------------------------------------------------------------------------------------------------------------------------------------------------------------------------------------------------------------------------------------------------------------------------------------------------------------------------------------------------------------------------------------------------------------------------------------------------|-------------------------------------------------------------------------------------------------------------------------------------------------|
| adolesc*.tw<br>preadolesc*.tw<br>pre-adolesc*.tw<br>boy*.tw<br>girl*.tw<br>child*.tw<br>infan*.tw<br>preschool*.tw<br>pre-school*.tw<br>juvenil*.tw<br>minor*.tw<br>p?ediatri*.tw<br>pubescen*.tw<br>pre-pubescen*.tw<br>prepubescen*.tw<br>puberty.tw<br>teen*.tw<br>young*.tw<br>youth*.tw<br>school*.tw<br>high-school*.tw<br>highschool*.tw<br>sibling*.tw<br>schoolchild*.tw<br>school child*.tw<br>children.tw<br>exp Adolescent<br>exp child, preschool<br>exp infant<br>exp minors<br>exp pediatr/ic | Chronic Fatigue Syndrome.tw<br>myalgic encephal*.tw<br>chronic fatigue syndrome*.mp.<br>exp Fatigue Syndrome, Chronic/<br>myalgic encephal*.mp. |
